# Supplementary material
Source: publisher site journal article supplement (https://www.dovepress.com/article/313577)

## Supplementary Material

Figure 1. a

Base case

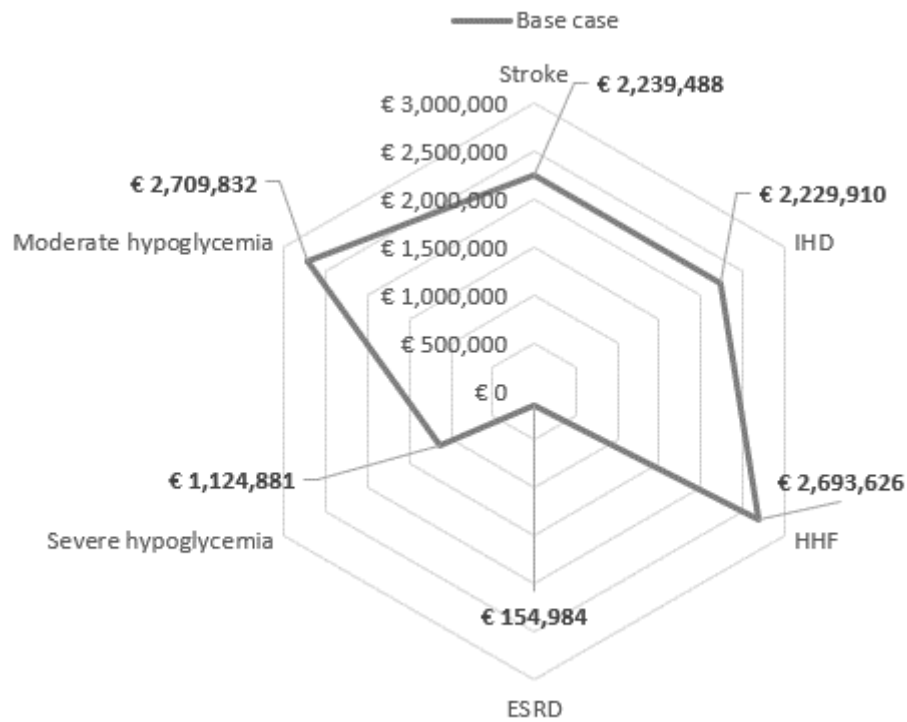

Figure 1. b

Simulation 1

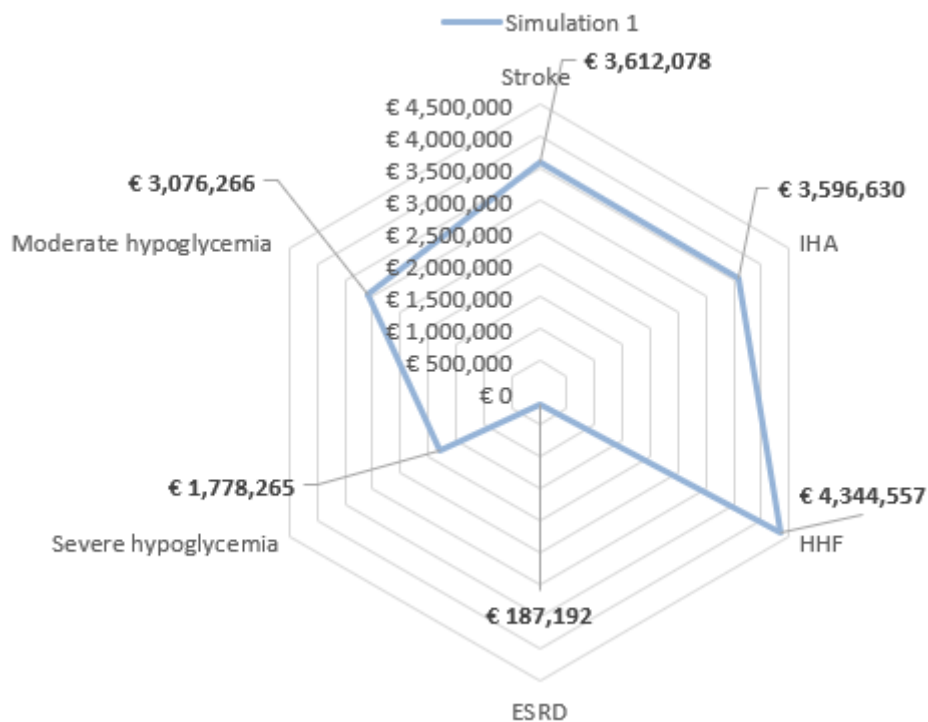

Figure 1. c

Simulation 2

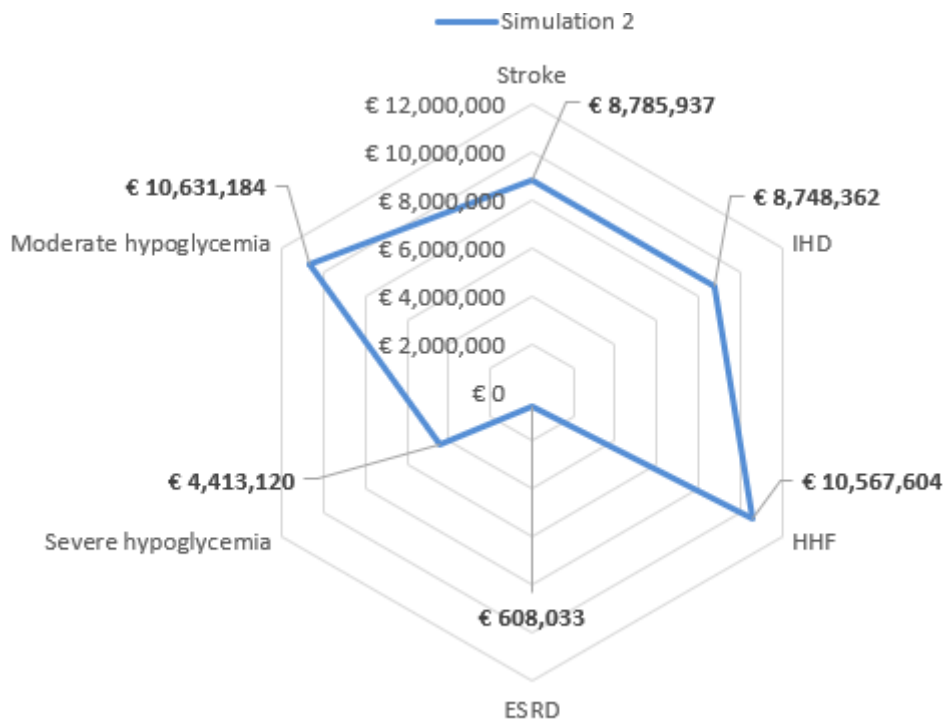

Figure 1. d

Simulation d

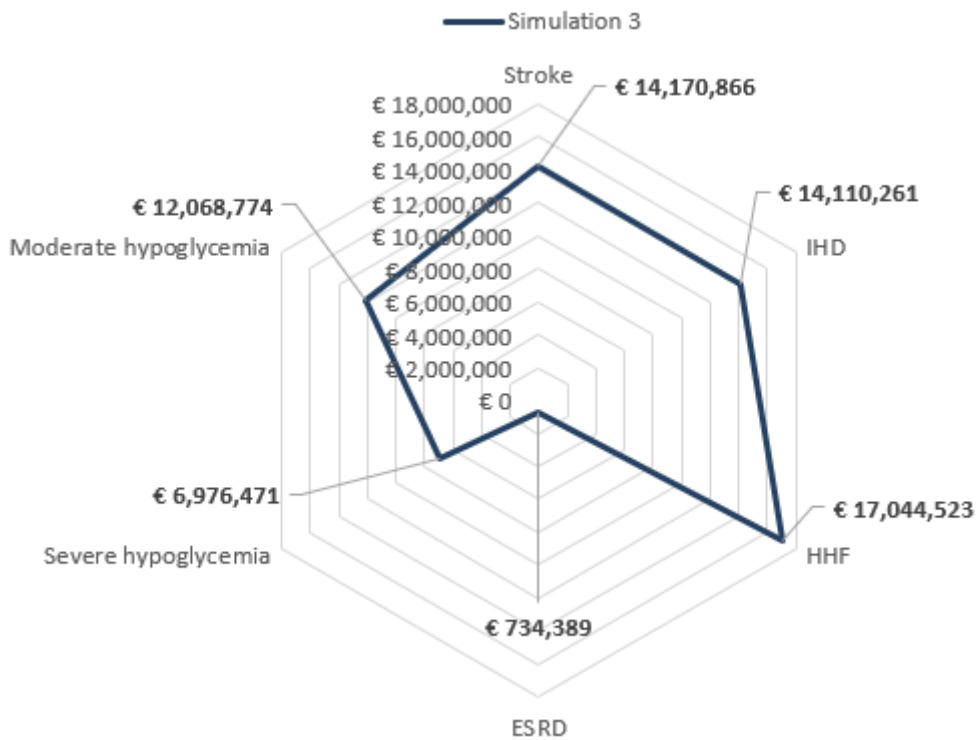

Supplement: Supplementary file 1 [file get_supplementary_file.php]
